# Supplementary material
Source: PubMed Central journal article supplement (PMC3656462)

**Figure e-2:**

A. Axial T2 FLAIR U-fibre hyperintensity in RRMS patient

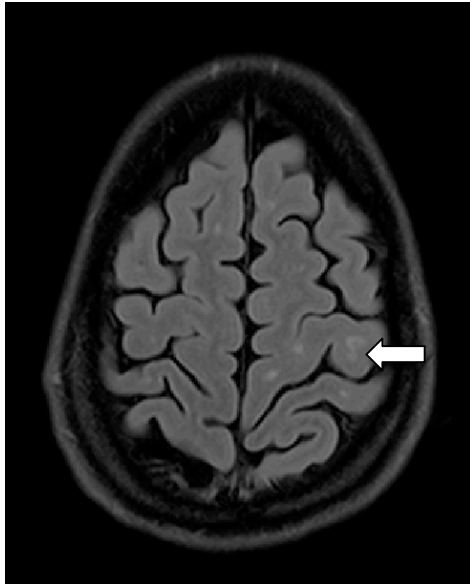

B. Sagittal T2 FLAIR showing ovoid lesions perpendicular to lateral ventricle (Dawson's Fingers) in a RRMS patient

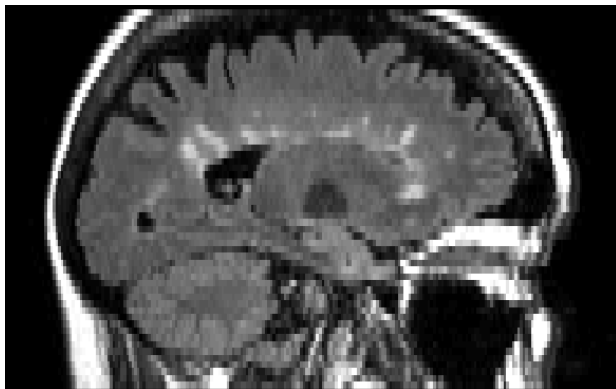

Supplement: supp_WNL.0b013e3182887957_Figure_e-2.pdf [file supp_WNL.0b013e3182887957_Figure_e-2.pdf]
