# Supplementary material
Source: PubMed Central journal article supplement (PMC3656462)

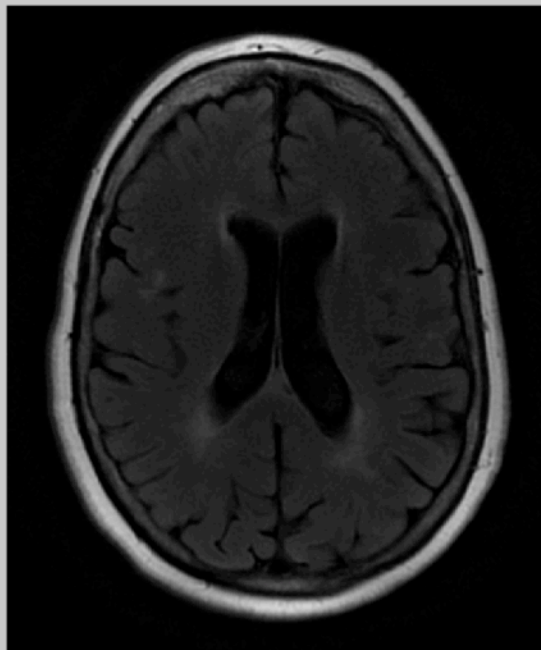

Patient 1: Age 72 years F

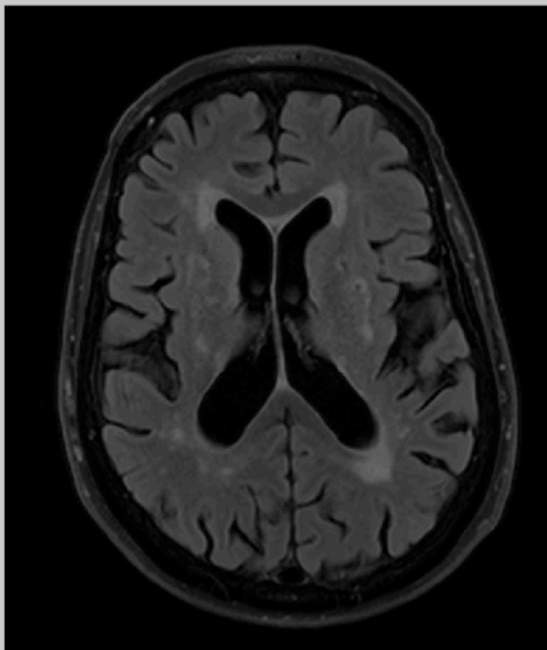

Patient 2: Age 76 years F

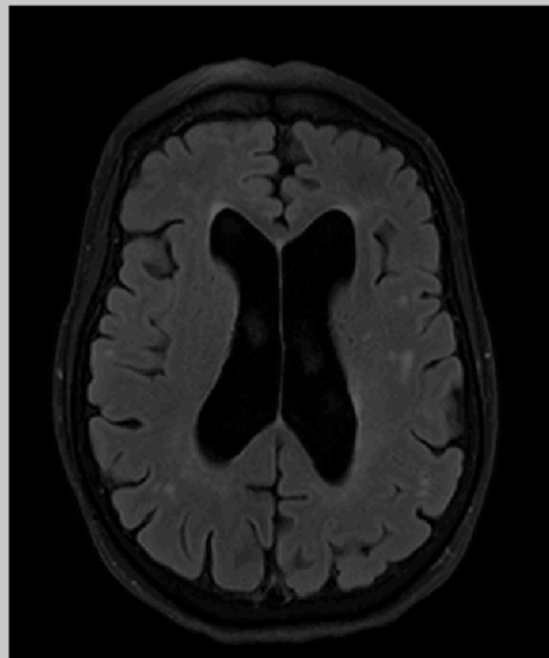

Patient 3: Age 77 years F

Supplement: supp_WNL.0b013e3182887957_Figure_e-1.pdf [file supp_WNL.0b013e3182887957_Figure_e-1.pdf]
